# Supplementary material for: Baseline Biomarkers for Outcome of Melanoma Patients Treated with Pembrolizumab
Source: Oxford University Press journal article supplement (doi:10.1158/1078-0432.ccr-16-0127), 2016-05-16
Supplement: 10780432ccr160127-sup-160787_1_supp_3426863_v4vjvb.docx [file 10780432ccr160127-sup-160787_1_supp_3426863_v4vjvb.docx]

**Supplementary Table 2: Overview of factors, cut-offs, and analysis of overall survival according to cohorts**

| **Factor** | **Categories** | **Univariate analysis of overall survival according to marker** | | | | **Multivariate analysis of confirmed markers** | | **Univariate validation of confirmed independent markers** | | **Multivariate validation of confirmed independent markers** | |
| --- | --- | --- | --- | --- | --- | --- | --- | --- | --- | --- | --- |
| **Identification cohort 1 (N=177)** | | **Confirmation cohort 2 (N=182)** | | **Cohorts 1&2 combined (N=346)** | | **Validation cohort 3 (N=257)** | | **Validation cohort 3 (N=166)** | |
| **Log rank P value** | **Inter-pretation** | **Log rank P value** | **Inter-pretation** | **Wald test**  **P value** | **Inter-pretation** | **Log rank P value** | **Inter-pretation** | **Wald test P value** | **Inter-pretation** |
| Gender | female vs. male | 8.00E-01 | failed |  |  |  |  |  |  |  |  |
| Visceral involvement | **Unresectable stage III, distant lymph nodes/soft tissue, lung** vs. other organs | 1.00E-04 | candidate | 3.70E-05 | confirmed | 2.48E-04 | independent | 6.00E-06 | confirmed association | 8,16E-03 | confirmed independent |
| Age | ≤67 years vs. >67 years | 7.41E-02 | failed |  |  |  |  |  |  |  |  |
| LDH-ratio | **≤1.7** vs. >1.7 | 6.82E-09 | candidate | 1.00E-06 | confirmed | not independent | |  |  |  |  |
| **≤2.5** vs. >2.5 | 1.09E-10 | candidate | 1.33E-09 | confirmed | 3.89E-06 | independent | 2.55E-10 | confirmed association | 3,14E-07 | confirmed independent |
| Abs. leucocyte counts | **<8750/µL** vs. ≥8750/µL | 1.97E-02 | candidate | 2.00E-06 | confirmed | not independent | |  |  |  |  |
| Abs. lymphocyte counts | <1450/µL vs. **≥1450/µL** | 9.10E-04 | candidate | 6.27E-02 | failed |  |  |  |  |  |  |
| <650/µL vs. **≥650/µL** | 2.05E-03 | candidate | 6.07E-02 | failed |  |  |  |  |  |  |
| Abs. monocyte counts | <750/µL vs. ≥750/µL | 1.32E-01 | failed |  |  |  |  |  |  |  |  |
| Abs. neutrophil counts | **<6050/µL** vs. ≥6050/µL | 7.58E-05 | candidate | 1.40E-05 | confirmed | not independent | |  |  |  |  |
| **<2950/µL** vs. ≥2950/µL | 5.30E-03 | candidate | 3.23E-01 | failed |  |  |  |  |  |  |
| Abs. eosinophil counts | <150/µL vs. **≥150/µL** | 2.08E-02 | candidate | 2.23E-03 | confirmed | not independent | |  |  |  |  |
| Abs. basophil counts | <50/µL vs. ≥50/µL | 4.91E-01 | failed |  |  |  |  |  |  |  |  |
| Rel. lymphocyte counts | <17.5% vs. **≥17.5%** | 1.12E-06 | candidate | 1.98E-04 | confirmed | 4.35E-04 | independent | 1.20E-05 | confirmed association | 3,09E-03 | confirmed independent |
| <26.5% vs. **≥26.5%** | 1.71E-04 | candidate | 1.80E-02 | confirmed | not independent | |  |  |  |  |
| Rel. monocyte counts | <7.5% vs. ≥7.5% | 5.62E-01 | failed |  |  |  |  |  |  |  |  |
| Rel. neutrophil counts | **<61.5%** vs. ≥61.5% | 1.75E-05 | candidate | 1.71E-02 | confirmed | not independent | |  |  |  |  |
| **<77.5%** vs. ≥77.5% | 1.15E-05 | candidate | 2.00E-06 | confirmed | not independent | |  |  |  |  |
| Rel. eosinophil counts | <1.5% vs. **≥1.5%** | 1.03E-06 | candidate | 1.73E-08 | confirmed | 4.22E-05 | independent | 2.70E-05 | confirmed association | 6,31E-03 | confirmed independent |
| Rel. basophil counts | <0.5% vs. **≥0.5%** | 1.20E-03 | candidate | 3.55E-02 | confirmed | not independent | |  |  |  |  |
