# Supplementary material for: Baseline Biomarkers for Outcome of Melanoma Patients Treated with Pembrolizumab
Source: Oxford University Press journal article supplement (doi:10.1158/1078-0432.ccr-16-0127), 2016-05-16
Supplement: 10780432ccr160127-sup-160787_1_supp_3426864_k4kjkb.docx [file 10780432ccr160127-sup-160787_1_supp_3426864_k4kjkb.docx]

**Supplementary Table 3: Relative proportion and survival analyses of all possible combination groups accounting for LDH, pattern of visceral metastasis, RLC and REC**

| **Stage III, no visceral metastasis other than lung** | **LDH-ratio ≤2.5** | **RLC ≥17.5%** | **REC ≥1.5%** | **Number of favorable factors** | **n** | **%** | **Median survival (months)** | **6-months survival rate [95% CI] (%)** | |
| --- | --- | --- | --- | --- | --- | --- | --- | --- | --- |
| Yes | Yes | Yes | Yes | 4 | 70 | 13.7 | Not reached | 95.3 | [90.1;100] |
| No | Yes | Yes | Yes | 3 | 117 | 22.9 | 16 | 89.2 | [82.4; 96.0] |
| Yes | Yes | No | Yes | 3 | 30 | 5.9 | 16 | 80.1 | [63.7; 96.6] |
| Yes | Yes | Yes | No | 3 | 11 | 2.1 | 18 | 100 |  |
| Yes | No | Yes | Yes | 3 | 2 | 0.4 | Not done (n<10) | | |
| No | Yes | No | Yes | 2 | 63 | 12.3 | 11 | 74.6 | [63.4; 85.9] |
| Yes | Yes | No | No | 2 | 21 | 4.1 | 16 | 82.9 | [64.7; 100] |
| No | Yes | Yes | No | 2 | 47 | 9.2 | 9 | 58.4 | [42.7; 74.0] |
| No | No | Yes | Yes | 2 | 9 | 1.8 | Not done (n<10) | | |
| Yes | No | No | Yes | 2 | 1 | 0.2 | Not done (n<10) | | |
| Yes | No | Yes | No | 2 | 0 | 0 | Not done (n<10) | | |
| No | Yes | No | No | 1 | 76 | 14.8 | 5 | 35.6 | [23.1; 48.0] |
| No | No | No | Yes | 1 | 17 | 3.3 | 2 | 26.5 | [3.8; 49.2] |
| No | No | Yes | No | 1 | 12 | 2.3 | 3 | 16.7 | [0.0; 43.3] |
| Yes | No | No | No | 1 | 4 | 0.8 | Not done (n<10) | | |
| No | No | No | No | 0 | 32 | 6.3 | 1 | 19.6 | [5.6%; 33.7] |
